# Supplementary material for: Novel methane activation by sulfur dioxide and molecular oxygen via trifluoroacetylsulfuric acid
Source: Royal Society of Chemistry journal article supplement (doi:10.1039/d2gc02707k), 2022-01-01

# **Novel Methane Activation by Sulfur Dioxide and Molecular Oxygen via Trifluoroacetylsulfuric Acid**

Supporting Information

Sungah Kim, Jen–Chieh Wang, Joo Ho Lee, and Kyung Woon Jung\*

Loker Hydrocarbon Research Institute, Department of Chemistry, University of Southern  
California, 837 Bloom Walk, Los Angeles, California 90089, United States

Email address: kwjung@usc.edu

# Table of Contents

## 1. Experimental Results

|                                                                                                                                                                       |    |
|-----------------------------------------------------------------------------------------------------------------------------------------------------------------------|----|
| 1.1. Table S1. Methane sulfonation by using SO <sub>2</sub> and O <sub>2</sub> . <sup>a</sup> .....                                                                   | S3 |
| 1.2. Table S2. Time study. <sup>a</sup> .....                                                                                                                         | S3 |
| 1.3. Table S3. Optimal ratio between sulfur dioxide and molecular oxygen during methane sulfonation conducted with 0.27 mmol trifluoroacetic acid. <sup>a</sup> ..... | S4 |
| 1.4. Table S4. Effects of anhydrous condition with the use of TFAA. <sup>a</sup> .....                                                                                | S5 |
| 1.5. Table S5. Effects of higher pressure in methane sulfonation. <sup>a</sup> .....                                                                                  | S5 |
| 1.6. Table S6. High methane conversion yields. <sup>a</sup> .....                                                                                                     | S6 |
| 1.7. Table S7. Confirmation of free radical mechanism of the methane sulfonation using radical scavenger. <sup>a</sup> .....                                          | S6 |

## 2. NMR analysis

|                                                                                                                              |    |
|------------------------------------------------------------------------------------------------------------------------------|----|
| 2.1. <sup>19</sup> F NMR spectrum (470 MHz, TFAD): Generation of trifluoroacetylsulfuric acid (TFAOSO <sub>3</sub> H). ..... | S7 |
| 2.2. <sup>1</sup> H NMR spectrum (400 MHz, TFAD): Unknown peak at 2.92 ppm.....                                              | S8 |

## 1. Experimental Results

1.1. Table S1. Methane sulfonation by using SO<sub>2</sub> and O<sub>2</sub>.<sup>a</sup>

| Entry | Temperature (°C) | H <sub>2</sub> O <sub>2</sub> (mol %) | MSA (yield %) <sup>b</sup> | Conv. (% CH <sub>4</sub> ) |
|-------|------------------|---------------------------------------|----------------------------|----------------------------|
| 1     | 50               | 15                                    | 67.6                       | 15.0                       |
| 2     | 50               | 20                                    | 74.3                       | 16.5                       |
| 3     | 60               | 15                                    | 73.1                       | 12.9                       |
| 4     | 60               | 20                                    | 75.2                       | 18.5                       |

Methane sulfonation was successfully conducted with SO<sub>2</sub> and O<sub>2</sub> resulting in high yields around 75 % at low temperatures. <sup>a</sup>Reaction conditions: solvent, TFAOH (0.3 mL) and TFAA (0.3 mL); H<sub>2</sub>O<sub>2</sub> (15–20 mol% based on SO<sub>2</sub>, 0.11–0.15 mmol); SO<sub>2</sub> (40 psi, 0.73 mmol); O<sub>2</sub> (30 psi, 0.12 mmol); CH<sub>4</sub> (200 psi, 3–3.3 mmol); time (18 h). <sup>b</sup>The percent yield of MSA was calculated based on SO<sub>2</sub>.

1.2. Table S2. Time study.<sup>a</sup>

| Entry | Time (h) | MSA (yield %) <sup>b</sup> | Conv. (% CH <sub>4</sub> ) |
|-------|----------|----------------------------|----------------------------|
| 1     | 2        | 36.6                       | 17.0                       |
| 2     | 4        | 37.9                       | 17.7                       |
| 3     | 6        | 38.7                       | 18.0                       |
| 4     | 8        | 40.0                       | 18.6                       |
| 5     | 18       | 40.1                       | 18.7                       |

Time study was conducted for the methane sulfonation. <sup>a</sup>Reaction conditions: Solvent, TFAA (0.6 mL); H<sub>2</sub>O<sub>2</sub> (21 mol% based on SO<sub>2</sub>, 0.27 mmol); SO<sub>2</sub> (80 psi, 1.3 mmol); O<sub>2</sub> (50 psi, 0.2 mmol); CH<sub>4</sub> (200 psi, 2.8 mmol); temperature (50 °C). <sup>b</sup>The percent yield of MSA was calculated based on SO<sub>2</sub>.

**1.3. Table S3. Optimal ratio between sulfur dioxide and molecular oxygen during methane sulfonation conducted with 0.27 mmol trifluoroacetic acid.<sup>a</sup>**

| <b>Entry</b>                                | <b>1</b>                        | <b>2</b>                       | <b>3</b>                       |
|---------------------------------------------|---------------------------------|--------------------------------|--------------------------------|
|                                             | <b>0.73 mmol SO<sub>2</sub></b> | <b>1.3 mmol SO<sub>2</sub></b> | <b>1.9 mmol SO<sub>2</sub></b> |
| <b>No O<sub>2</sub></b>                     | 9.7 %                           | 5.6 %                          | 3.4 %                          |
| <b>20 psi O<sub>2</sub><br/>(0.07 mmol)</b> | 38 %                            | 19 %                           | 11 %                           |
| <b>30 psi O<sub>2</sub><br/>(0.12 mmol)</b> | 54%                             | 27 %                           | 18 %                           |
| <b>50 psi O<sub>2</sub><br/>(0.20 mmol)</b> | 64 %                            | 40 %                           | 26 %                           |
| <b>80 psi O<sub>2</sub><br/>(0.36 mmol)</b> | 31 %                            | 46 %                           | 46 %                           |

Under various concentrations of SO<sub>2</sub> and O<sub>2</sub>, the optimal ratio between SO<sub>2</sub> and O<sub>2</sub> exhibiting a highest MSA percent yield was determined when 0.27 mmol of TFAO—OH was employed (SO<sub>2</sub>/O<sub>2</sub>=3.7). MSA yield was calculated based on SO<sub>2</sub> added. <sup>a</sup>Reaction conditions: solvent, TFAOH (0.3 mL) and TFAA (0.3 mL); H<sub>2</sub>O<sub>2</sub> (0.27 mmol); CH<sub>4</sub> (200 psi, 3 mmol); temperature (50 °C); time (18 h).

**1.4. Table S4. Effects of anhydrous condition with the use of TFAA.<sup>a</sup>**

| Entry          | H <sub>2</sub> O <sub>2</sub> (mol %) | Reaction solution                            | MSA (yield %) <sup>c</sup> |
|----------------|---------------------------------------|----------------------------------------------|----------------------------|
| 1              | 20                                    | Absence of TFAA<br>(TFAOH only as a solvent) | 32.8                       |
| 2 <sup>b</sup> | 20                                    | Application of additional 2 $\mu$ L of water | 6.8                        |

The reaction was conducted 1) without TFAA in the reaction mixture after the addition of H<sub>2</sub>O<sub>2</sub>, and 2) with additional 2  $\mu$ L of water in the absence of TFAA to figure out the effects of anhydrous condition in methane sulfonation. <sup>a</sup>Reaction conditions: solvent, TFAA (0.122 mL); H<sub>2</sub>O<sub>2</sub> (20 mol% based on SO<sub>2</sub>, 0.15 mmol); SO<sub>2</sub> (40 psi, 0.73 mmol); O<sub>2</sub> (30 psi, 0.12 mmol); CH<sub>4</sub> (200 psi, 3 mmol); temperature (50 °C); time (18 h); <sup>b</sup>Additional water was applied to the reaction mixture (0.002 mL, 0.11 mmol). <sup>c</sup>The percent yield of MSA was calculated based on SO<sub>2</sub>.

**1.5. Table S5. Effects of higher pressure in methane sulfonation.<sup>a</sup>**

| Entry | H <sub>2</sub> O <sub>2</sub> (mol %) | Final pressure (psi)        | MSA (yield %) <sup>b</sup> | Conv. (% CH <sub>4</sub> ) |
|-------|---------------------------------------|-----------------------------|----------------------------|----------------------------|
| 1     | 15                                    | 58 psi with CH <sub>4</sub> | 33.0                       | 45.2                       |
| 2     | 20                                    | 59 psi with CH <sub>4</sub> | 33.1                       | 46.2                       |
| 3     | 15                                    | 400 psi with N <sub>2</sub> | 48.7                       | 56.0                       |
| 4     | 20                                    | 420 psi with N <sub>2</sub> | 47.3                       | 54.5                       |

By adding N<sub>2</sub> gas after charging with SO<sub>2</sub>, O<sub>2</sub>, and CH<sub>4</sub>, the sulfonation of methane was conducted under higher pressure. <sup>a</sup>Reaction conditions: solvent, TFAOH (0.3 mL) and TFAA (0.3 mL); H<sub>2</sub>O<sub>2</sub> (15–20 mol% based on SO<sub>2</sub>, 0.11–0.15 mmol); SO<sub>2</sub> (40 psi, 0.73 mmol); O<sub>2</sub> (30 psi, 0.1 mmol for entry 1–2; 0.04 mmol for entry 3–4); CH<sub>4</sub> (0.5–0.6 mmol); N<sub>2</sub> (~ 400 psi); temperature (50 °C); time (18 h). <sup>b</sup>The percent yield of MSA was calculated based on SO<sub>2</sub>.

**1.6. Table S6. High methane conversion yields.<sup>a</sup>**

| Entry | H <sub>2</sub> O <sub>2</sub> (mol %) | N <sub>2</sub> (psi) | MSA (yield %) <sup>b</sup> | Conv. (% CH <sub>4</sub> ) |
|-------|---------------------------------------|----------------------|----------------------------|----------------------------|
| 1     | 15                                    | 230                  | 23.2                       | 93.6                       |
| 2     | 20                                    | 210                  | 24.5                       | 94.6                       |

With the help of additional N<sub>2</sub>, methane conversion yields increased up to 95% when CH<sub>4</sub> was employed as a limiting reagent. <sup>a</sup>Reaction conditions: solvent, TFAOH (0.3 mL) and TFAA (0.3 mL); H<sub>2</sub>O<sub>2</sub> (20 mol% based on SO<sub>2</sub>, 0.15 mmol); SO<sub>2</sub> (40 psi, 0.73mmol); O<sub>2</sub> (30 psi, 0.04mmol); CH<sub>4</sub> (0.18—0.19mmol); N<sub>2</sub> (~ 230 psi); temperature (50 °C); time (18 h). <sup>b</sup>The percent yield of MSA was calculated based on SO<sub>2</sub>.

**1.7. Table S7. Confirmation of free radical mechanism of the methane sulfonation using radical scavenger.<sup>a</sup>**

| Entry | H <sub>2</sub> O <sub>2</sub> (mol %) | Radical Scavenger | MSA (yield %) <sup>b</sup> | Conv. (% CH <sub>4</sub> ) |
|-------|---------------------------------------|-------------------|----------------------------|----------------------------|
| 1     | 20                                    | -                 | 74.3                       | 16.5                       |
| 2     | -                                     | -                 | 0                          | 0                          |
| 3     | 20                                    | 20 mol% TEMPO     | 3.3                        | 0.7                        |
| 4     | 20                                    | 20 mol% BHT       | 0                          | 0                          |

<sup>a</sup>Reaction conditions: solvent, TFAOH (0.3 mL) and TFAA (0.3 mL); H<sub>2</sub>O<sub>2</sub> (20 mol% based on SO<sub>2</sub>, 0.15 mmol); SO<sub>2</sub> (40 psi, 0.73 mmol); O<sub>2</sub> (30 psi, 0.12 mmol); CH<sub>4</sub> (200 psi, 3—3.3 mmol); time (18 h). <sup>b</sup>The percent yield of MSA was calculated based on SO<sub>2</sub>.

## 2. NMR analysis

### 2.1. $^{19}\text{F}$ NMR spectrum: (470 MHz, TFAD): Generation of trifluoroacetylsulfuric acid ( $\text{TFAOSO}_3\text{H}$ ).

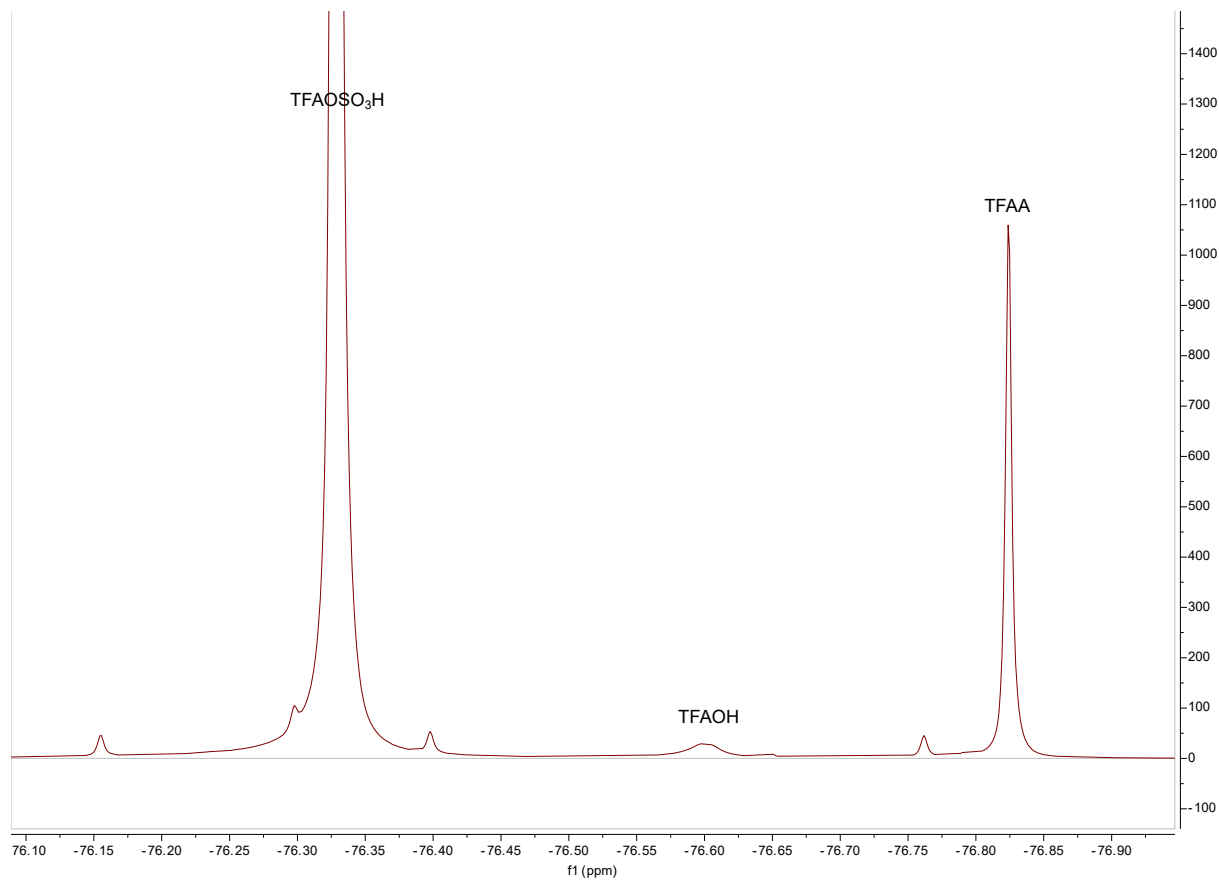

After the reaction mixture containing TFAA, TFAOH,  $\text{H}_2\text{O}_2$ ,  $\text{SO}_2$  and  $\text{O}_2$  was stirred at  $50\text{ }^\circ\text{C}$  for 16 h,  $\text{TFAOSO}_3\text{H}$  was extracted with  $\text{DCM-d}_2$  for NMR analysis. TFAOH, TFAA and  $\text{H}_2\text{O}$  diluted in  $\text{DCM-d}_2$  were added separately to distinguish the observed peaks from each other. Depending on the amount and the ratio of TFAOH and  $\text{TFAOSO}_3\text{H}$ , TFAOH and  $\text{TFAOSO}_3\text{H}$  peaks shifted, however, the pattern between  $\text{TFAOSO}_3\text{H}$ , TFAOH, and TFAA remained the same.

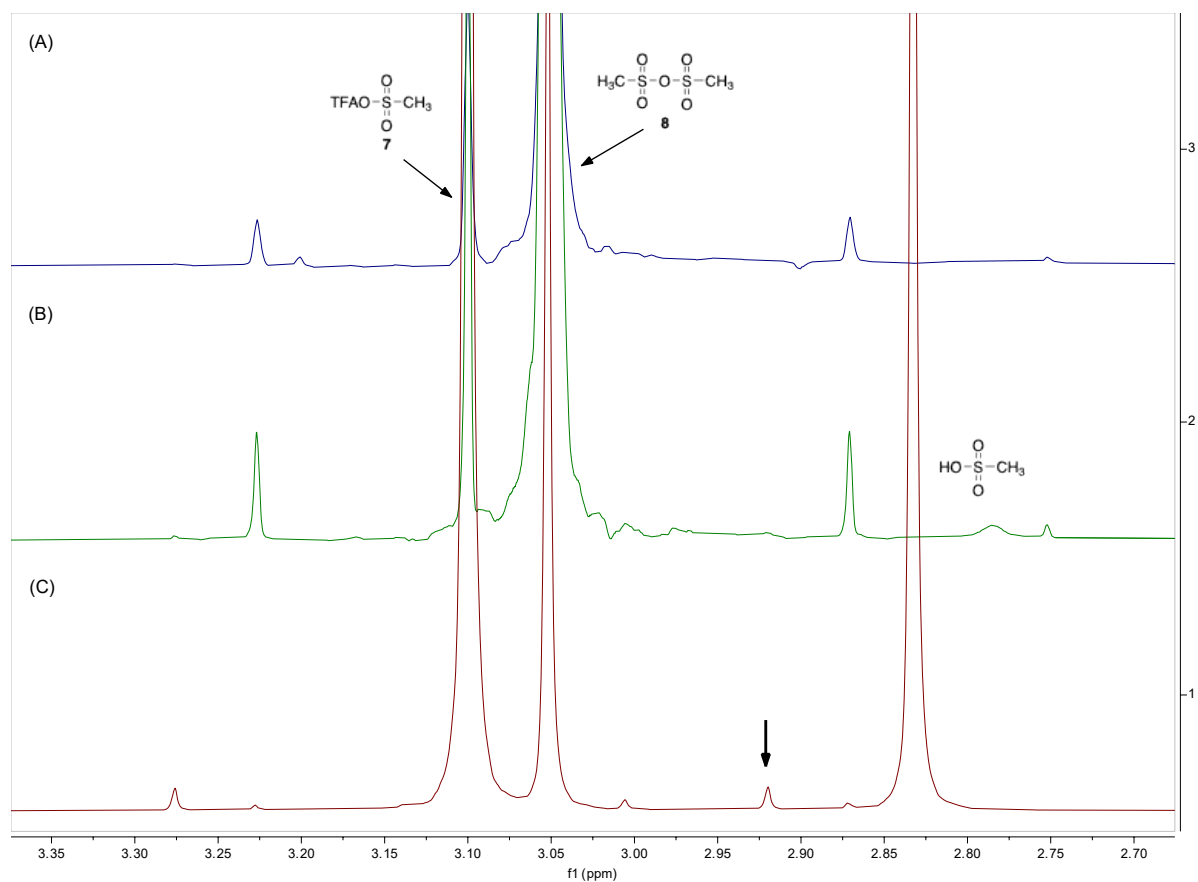

**2.2. <sup>1</sup>H NMR spectrum (400 MHz, TFAD): Unknown peak at 2.92 ppm.**

Reaction conditions: (A) When methanesulfonic anhydride (**8**) was added to the solution of 0.3 mL TFAD and 0.2 mL TFAA, the formation of **7** was detected to exhibit **7** and **8**. (B) When 3  $\mu$ L H<sub>2</sub>O<sub>2</sub> was added to the solution of (A), no peak was observed at around 2.92 ppm. (C) When 10  $\mu$ L TFAOSO<sub>3</sub>H was added to the solution of (A), a small peak around 2.92 ppm was detected.

In Figure 4, we identified **7**, **8**, and MSA, however small peaks at 3.18 and 2.82 ppm were not elucidated unambiguously. However, we conducted the experiments using unlabeled MSAA (**8**) and obtained NMR spectra as shown here. We identified **7** and **8** along with MSA in these solvent systems, and observed a minor peak at 2.92 ppm, which would correspond with the small peaks at 3.18 and 2.82 ppm in the previous experiment and its NMR



spectrum. Thus we speculate the peak at 2.92 ppm as one of the methanesulfonic anhydride derivative such as

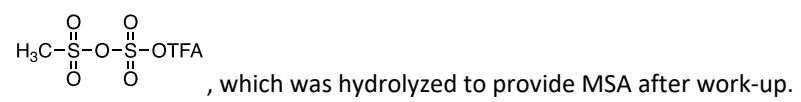

Supplement: d2gc02707k1.pdf [file d2gc02707k1.pdf]
